# Supplementary material
Source: PubMed Central journal article supplement (PMC3732122)
Supplement: Supp_Fig1.pdf [file Supp_Fig1.pdf]

## Supplementary Data

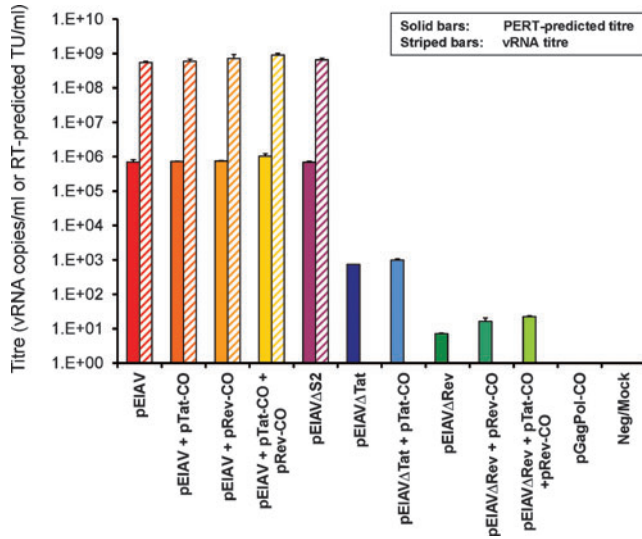

**SUPPLEMENTARY FIG. S1.** Analysis of vRNA content of VLPs produced by 92BR cultures pseudo-infected with mutant EIAV viruses. Supernatants from day 34 p.t. of the timecourse study (Figure 5) were analysed for vRNA content (GagPol slip region) by quantitative RT-PCR and for RT activity by PERT (n=2). See Materials and Methods for lower-limits of detection for assays.
