# Supplementary material
Source: PubMed Central journal article supplement (PMC3732122)
Supplement: Supp_Table1.pdf [file Supp_Table1.pdf]

SUPPLEMENTARY TABLE S1. PROBABILITY TABLE FOR MONITORING EXPECTED INFECTION RATES<sup>a</sup>

|                                               |                           | Probability table                                     |                                           |                                                    |                                           |                                                      |                                           |         |
|-----------------------------------------------|---------------------------|-------------------------------------------------------|-------------------------------------------|----------------------------------------------------|-------------------------------------------|------------------------------------------------------|-------------------------------------------|---------|
|                                               |                           | MID <sup>p=0.32</sup> per vessel<br>(0.39 IUs/vessel) |                                           | MID <sup>p=0.63</sup> per vessel<br>(1 IUs/vessel) |                                           | MID <sup>p=0.98</sup> per vessel<br>(3.9 IUs/vessel) |                                           |         |
| Outcome<br>(infected vessels)<br>( <i>r</i> ) | Number of<br>permutations | Probability of<br>single outcome                      | Total<br>probability<br>( <i>p[r/n]</i> ) | Probability of<br>single outcome                   | Total<br>probability<br>( <i>p[r/n]</i> ) | Probability of<br>single outcome                     | Total<br>probability<br>( <i>p[r/n]</i> ) |         |
| $a = r/n$                                     | $b = n!/(n-r!) \times r!$ | $c = 0.32^r \times 0.68^{n-r}$                        | $d = b \times c$                          | $c = 0.63^r \times 0.37^{n-r}$                     | $d = b \times c$                          | $c = 0.98^r \times 0.02^{n-r}$                       | $d = b \times c$                          |         |
| I                                             | 0/4                       | 1                                                     | 0.210                                     | 0.210                                              | 0.018                                     | 0.018                                                | 1.6E-07                                   | 1.6E-07 |
|                                               | 1/4                       | 4                                                     | 0.100                                     | 0.401                                              | 0.031                                     | 0.126                                                | 7.8E-06                                   | 3.1E-05 |
|                                               | 2/4                       | 6                                                     | 0.048                                     | 0.287                                              | 0.054                                     | 0.325                                                | 3.8E-04                                   | 0.002   |
|                                               | 3/4                       | 4                                                     | 0.023                                     | 0.091                                              | 0.093                                     | 0.372                                                | 0.019                                     | 0.075   |
|                                               | 4/4                       | 1                                                     | 0.011                                     | 0.011                                              | 0.160                                     | 0.160                                                | 0.922                                     | 0.922   |
| II                                            | 0/10                      | 1                                                     | 0.020                                     | 0.020                                              |                                           |                                                      |                                           |         |
|                                               | 1/10                      | 10                                                    | 0.010                                     | 0.096                                              |                                           |                                                      |                                           |         |
|                                               | 2/10                      | 45                                                    | 0.005                                     | 0.207                                              | nc                                        |                                                      | nc                                        |         |
|                                               | 3/10                      | 120                                                   | 0.002                                     | 0.264                                              |                                           |                                                      |                                           |         |
|                                               | 4/10                      | 210                                                   | 0.001                                     | 0.220                                              |                                           |                                                      |                                           |         |
| III                                           | 9/16                      | 1.1E+04                                               |                                           |                                                    | 1.5E-05                                   | 0.168                                                |                                           |         |
|                                               | 10/16                     | 8.0E+03                                               | nc                                        |                                                    | 2.5E-05                                   | 0.202                                                | nc                                        |         |
|                                               | 11/16                     | 4.4E+03                                               |                                           |                                                    | 4.3E-05                                   | 0.189                                                |                                           |         |
| IV                                            | 5/20                      | 1.6E+04                                               | 1.0E-05                                   | 0.157                                              |                                           |                                                      |                                           |         |
|                                               | 6/20                      | 3.9E+04                                               | 4.8E-06                                   | 0.187                                              | nc                                        |                                                      | nc                                        |         |
|                                               | 7/20                      | 7.8E+04                                               | 2.3E-06                                   | 0.178                                              |                                           |                                                      |                                           |         |
| V                                             | 31/100                    | 2.9E+25                                               | 1.2E-27                                   | 0.037                                              |                                           |                                                      |                                           |         |
|                                               | 32/100                    | 1.4E+26                                               | 5.9E-28                                   | 0.085                                              | nc                                        |                                                      | nc                                        |         |
|                                               | 33/100                    | 2.9E+26                                               | 2.8E-28                                   | 0.084                                              |                                           |                                                      |                                           |         |
|                                               | 62/100                    | 5.7E+27                                               |                                           |                                                    | 1.4E-29                                   | 0.079                                                |                                           |         |
|                                               | 63/100                    | 3.4E+27                                               | nc                                        |                                                    | 2.4E-29                                   | 0.082                                                | nc                                        |         |
|                                               | 64/100                    | 2.0E+27                                               |                                           |                                                    | 4.1E-29                                   | 0.082                                                |                                           |         |
|                                               | 97/100                    | 1.6E+05                                               |                                           |                                                    |                                           |                                                      | 1.1E-06                                   | 0.182   |
|                                               | 98/100                    | 5.0E+03                                               | nc                                        |                                                    | nc                                        |                                                      | 5.5E-05                                   | 0.273   |
|                                               | 99/100                    | 100                                                   |                                           |                                                    |                                           |                                                      | 0.003                                     | 0.271   |
| 100/100                                       | 1                         |                                                       |                                           |                                                    |                                           | 0.133                                                | 0.133                                     |         |

IU, infectious units; MID, minimal infectious dose; nc, not calculated.

<sup>a</sup>The possible outcomes (*r*) of *n* number of vessels inoculated with virus at different doses are presented as *a*, in the second column. The number of permutations for each outcome is given as *b*, in the third column. The probability of a single given outcome is denoted by *c*. Therefore the total probability of any combination resulting in *r/n* infections is calculated by *d*. Panel I displays the full outcome set of inoculating four vessels; note that the sum of all *d* probabilities equals 1. Panels I–IV display predicted outcomes for EIAVΔS2 dose validation experiments reported in this paper (see text), and panel V is included to confirm to the reader the validity of the calculations; the most probable outcomes correlate with the dose and rate of infection employed.
