# Supplementary material
Source: PubMed Central journal article supplement (PMC3732122)
Supplement: Supp_Table2.pdf [file Supp_Table2.pdf]

SUPPLEMENTARY TABLE S2. ACCUMULATED DATA FROM ET-RCL ASSAY TEST RUNS<sup>a</sup>

| Assay #       | Initiated | Type | Purpose     | Batch number       | PERT endpoint |              |                          | ET-RCL assay |             | MLV/HEK293   |        | Comment        |
|---------------|-----------|------|-------------|--------------------|---------------|--------------|--------------------------|--------------|-------------|--------------|--------|----------------|
|               |           |      |             |                    | Negative      | Positive     | Spike                    | 10x Spike    | 0.1 x Spike | Test         | result |                |
| RCL#001       | 24-May-10 | FDP  | Pilot       | D141/RETI/FCC001   | 0/1           | 1/1          | 1/1                      | nd           | 1/5         | nd           | Pass   | na             |
| RCL#002       | 24-May-10 | FDP  | Pilot       | D141/RETI/FCC001   | 0/1           | 1/1          | 1/1                      | nd           | 1/5         | nd           | Pass   | na             |
| RCL-CC#001    | 16-Jun-10 | EOPC | Pilot       | 140510RT048 (IH48) | 0/1           | 1/1          | 1/1                      | nd           | na          | 0/2          | Pass   | nd             |
| RCL-CC#002    | 16-Jun-10 | EOPC | Pilot       | 140510RT048 (IH48) | 0/1           | 1/1          | 1/1                      | nd           | na          | 0/2          | Pass   | nd             |
| RCL#003       | 09-Jul-10 | FDP  | lot release | G141/RETI/FCC001   | 0/1           | 1/1          | 1/1                      | nd           | na          | 0/10         | Pass   | Pass           |
| RCL-CC#003    | 09-Jul-10 | EOPC | lot release | G141/RETI/EPCB001  | 0/1           | 1/1          | 1/1                      | nd           | na          | 0/10         | Pass   | Pass           |
| RCL-CC#004    | 09-Jul-10 | EOPC | lot release | G141/RETI/EPCB002  | 0/1           | 1/1          | 1/1                      | nd           | na          | 0/10         | Pass   | Pass           |
| RCL-CC#005    | 19-Jul-10 | EOPC | lot release | G141/RETI/EPCB003  | 0/1           | 1/1          | 1/1                      | nd           | na          | 0/10         | Pass   | Pass           |
| RCL#004       | 01-Oct-10 | FDP  | lot release | G145/STAR/FCC001   | 0/1           | 1/1          | 1/1                      | nd           | na          | 0/10         | Pass   | Pass           |
| RCL-CC#006    | 01-Oct-10 | EOPC | lot release | G145/STAR/EPCB001  | 0/1           | 1/1          | 0/1 <sup>a</sup>         | nd           | na          | 0/10         | Fail   | Assay repeated |
| RCL-CC#007    | 01-Oct-10 | EOPC | lot release | G145/STAR/EPCB002  | 0/1           | 1/1          | 1/1                      | nd           | na          | 0/10         | Pass   | Pass           |
| RCL-CC#008    | 01-Oct-10 | EOPC | lot release | G145/STAR/EPCB003  | 0/1           | 1/1          | 1/1                      | nd           | na          | 0/10         | Pass   | Pass           |
| RCL-CC#009    | 07-Jan-11 | EOPC | lot release | G145/STAR/EPCB001  | 0/1           | 1/1          | 0/1                      | nd           | na          | 0/10         | Fail   | Assay repeated |
| RCL-CC#014    | 29-Mar-11 | EOPC | lot release | G145/STAR/EPCB001  | 0/1           | 1/1          | 3/3                      | 1/1          | na          | 0/10         | Pass   | nd             |
| RCL-CC#010    | 07-Jan-11 | EOPC | lot release | G154/USHS/EPCB001  | 0/1           | 1/1          | 1/1                      | nd           | na          | 0/10         | Pass   | Pass           |
| RCL-CC#011    | 07-Jan-11 | EOPC | lot release | G154/USHS/EPCB002  | 0/1           | 1/1          | 1/1                      | nd           | na          | 0/10         | Pass   | Pass           |
| RCL#005       | 03-Jun-11 | FDP  | lot release | G154/USHS/FCC001   | 0/1           | 1/1          | 0/1                      | nd           | na          | 0/10         | Fail   | Assay repeated |
| RCL#007       | 10-Aug-11 | FDP  | lot release | G154/USHS/FCC001   | 0/1           | 2/2          | 0/2                      | 1/1          | na          | 0/10         | Pass   | Pass           |
| RCL#005a      | 23-Aug-11 | FDP  | Amendment   | EOACs from RCL#005 | 0/1           | 1/1          | 1/1                      | nd           | na          | na           | Pass   | na             |
| RCL-CC#015    | 14-Jun-11 | EOPC | lot release | G154/USHS/EPCB003  | 0/1           | 1/1          | 1/1                      | nd           | na          | 0/10         | Pass   | Pass           |
| RCL-CC#016    | 28-Oct-11 | EOPC | lot release | G165/USHS/EPCB001  | 0/1           | 1/1          | 1/1                      | 1/1          | na          | 0/10         | Pass   | Pass           |
| RCL-CC#017    | 28-Oct-11 | EOPC | lot release | G165/USHS/EPCB002  | 0/1           | 0/1          | 1/1                      | 1/1          | na          | 0/10         | Pass*  | Pass           |
| <b>Totals</b> |           |      |             |                    | <b>0/22</b>   | <b>22/23</b> | <b>20/24<sup>†</sup></b> | <b>4/4</b>   |             | <b>0/174</b> |        |                |
| FDP assay     |           |      |             |                    | 0/7           | 8/8          | 5/8                      | 1/1          |             | 0/40         |        |                |
| EOPC assay    |           |      |             |                    | 0/15          | 14/15        | 15/16                    | 3/3          |             | 0/134        |        |                |

EOPCs, end-of-production cells; ET-RCL, equine-tropic replication-competent lentivirus; FDP, final drug product; MLV, murine leukemia virus; na, not applicable; nd, not done; PERT, product-enhanced reverse transcriptase.

<sup>a</sup>Shown are all clinical-lot GMP ET-RCL assay results to date, including those of pilot and troubleshooting runs. No RCL has ever been detected in FDP of EOPCs in either the ET-RCL assay or MLV/HEK293 RCL assays. The observed positive control or spike control failures are summarized and have formed the basis for exploratory studies into EIAVAS2 inhibition.

<sup>†</sup>Spike flask bacterially/fungally contaminated.

<sup>\*</sup>Excluding spike failure of RCL-CC#006.

<sup>‡</sup>Characterization of RT source demonstrated the presence of EIAVAS2.
